# Supplementary material for: In Situ Green Synthesis of Mil-100(Fe) Modified Edta as an Enhanced Candidate Detoxifying Agent of Lead Heavy Metal (Pb) and Its Adsorption Characteristics
Source: Research Square preprint supplement (doi:10.21203/rs.3.rs-810297/v1), 2021-09-13
Supplement: Supplementary file 1 [file f531b5cf5885ddfbe04d976d.docx]

**Electronic Supporting Information**

**IN SITU GREEN SYNTHESIS OF MIL-100(Fe) MODIFIED EDTA AS AN ENHANCED CANDIDATE DETOXIFYING AGENT OF LEAD HEAVY METAL (Pb) AND ITS ADSORPTION CHARACTERISTICS**

**Witri Wahyu Lestari, Rika Meilani, I. F. Nurcahyo, Larasati**

*Department of Chemistry, Faculty of Mathematics and Natural Science, Universitas Sebelas Maret., Jl. Ir. Sutami No. 36 A Kentingan, Jebres, Surakarta. 57126. Indonesia*

*Corresponding author:* [*witri@mipa.uns.ac.id*](mailto:witri@mipa.uns.ac.id)

**Section S1. XRD pattern of the as synthesized materials and the standard patterns of MIL-100(Fe) and H3BTC ligand 2**

**Section S2. Thermogram of MIL-100(Fe) and MIL-100(Fe)-EDTA 3**

**Section S3. SEM imaging and particle size distribution histogram 4**

**Section S4. TEM imaging and particle size distribution histogram 5**

**Section S5. FTIR of MIL-100(Fe) and MIL-100(Fe)-EDTA after suspension in H2O, gastric, and intestinal media compared with the initial materials 6**

**Section S6. The experimental data and result of the adsorption efficiency measurement 7**

**Section S7. Adsorption Kinetics 12**

**Section S8. Adsorption Isotherm 14**

**Section S1. XRD pattern of the as synthesized materials and the standard patterns of MIL-100(Fe) and H3BTC ligand**


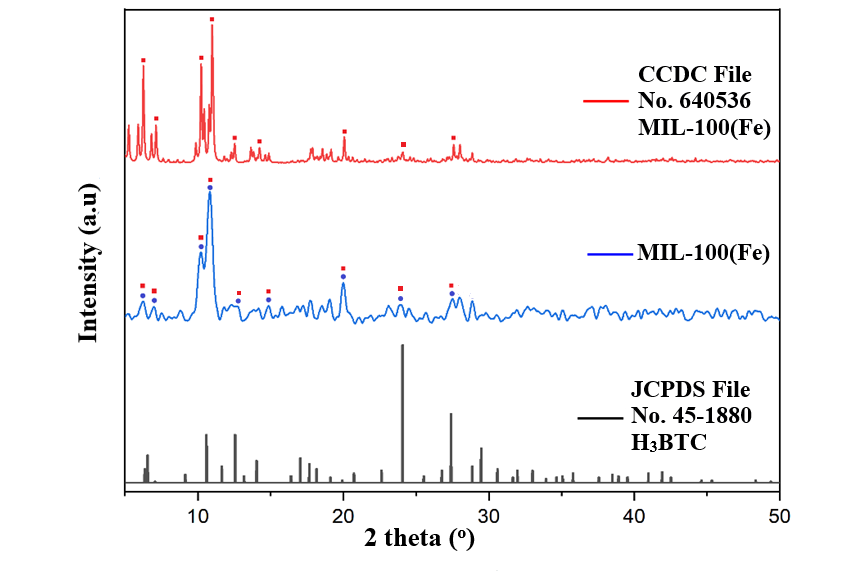


**Figure S1**. Diffractogram of the as-synthesized MIL-100(Fe) compared to standard pattern (CCDC No. 640536) and H3BTC ligand (JCPDS No. 45-1880)

**Section S2. Thermogram of MIL-100(Fe) and MIL-100(Fe)-EDTA**


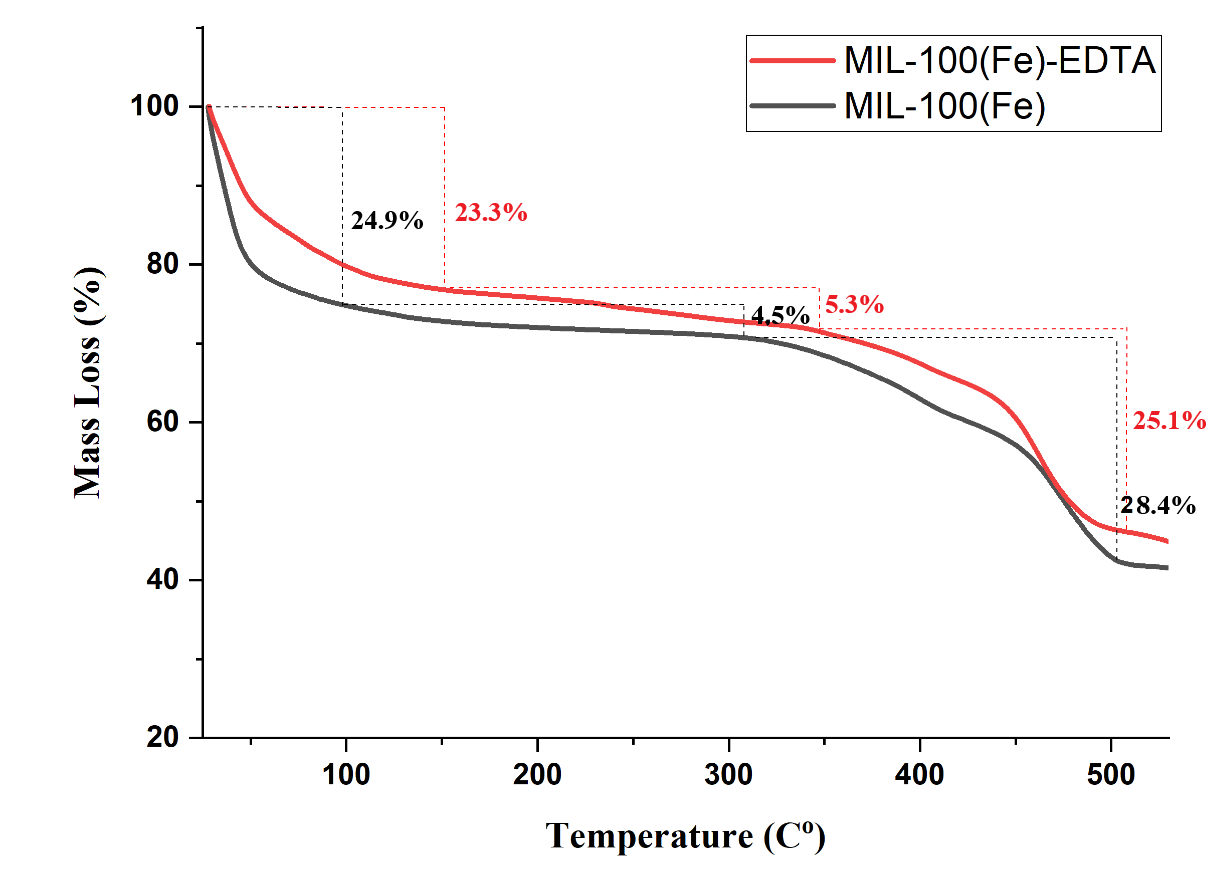


**Figure S2**. Thermogram of MIL-100(Fe) (black) and MIL-100(Fe)-EDTA (red)

**Section S3. SEM imaging and particle size distribution histogram**


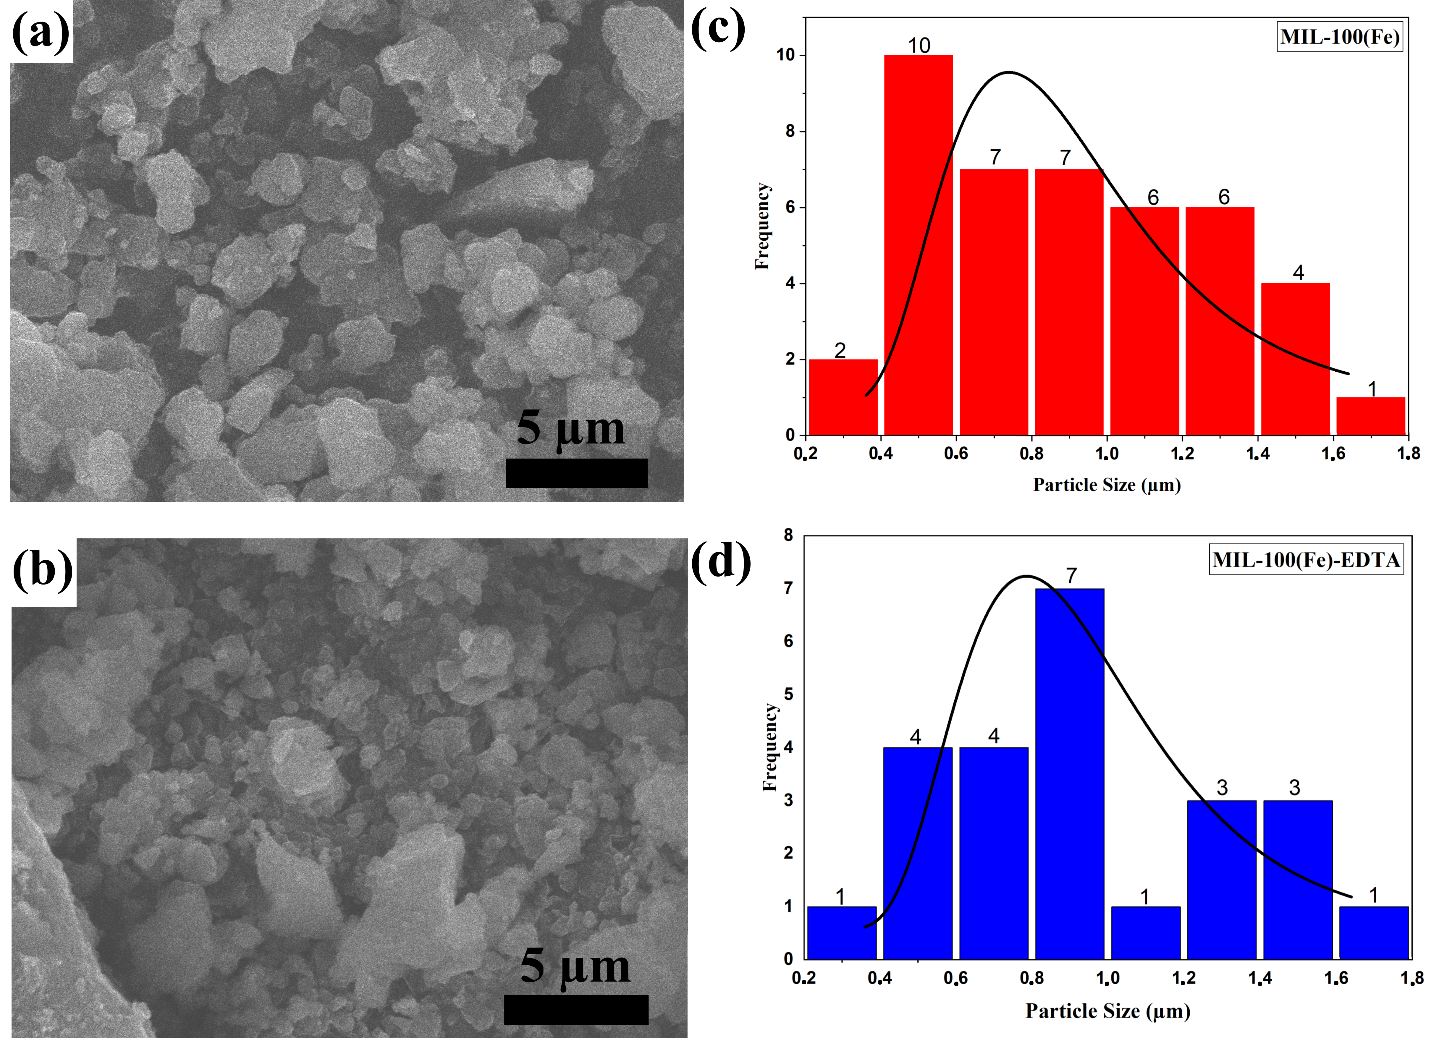


Figure S3. SEM imaging of MIL-100(Fe) (a) and MIL-100(Fe)-EDTA (b) and particle size distribution histogram of MIL-100(Fe) (c) and MIL-100(Fe)-EDTA (d)

**Section S4. TEM imaging and particle size distribution histogram**


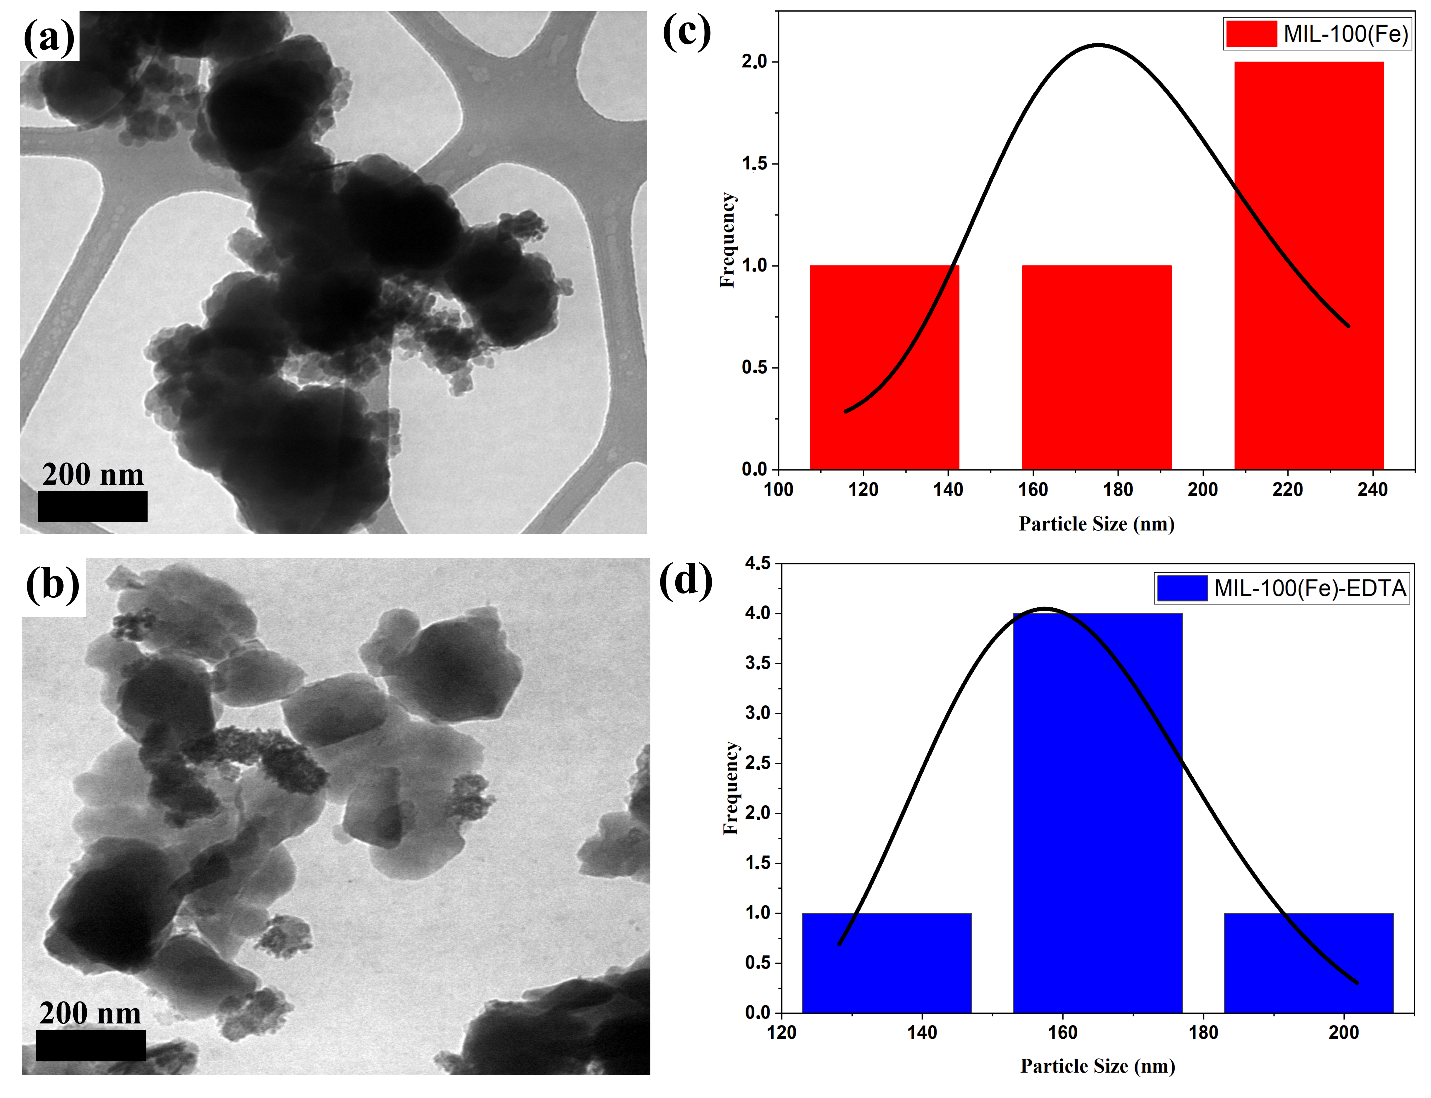


Figure S4. TEM imaging of MIL-100(Fe) (a) and MIL-100(Fe)-EDTA (b) and particle size distribution histogram of MIL-100(Fe) (c) and MIL-100(Fe)-EDTA (d)

**Section S5. FTIR of MIL-100(Fe) and MIL-100(Fe)-EDTA after suspension in H2O, gastric, and intestinal media compared with the initial materials**


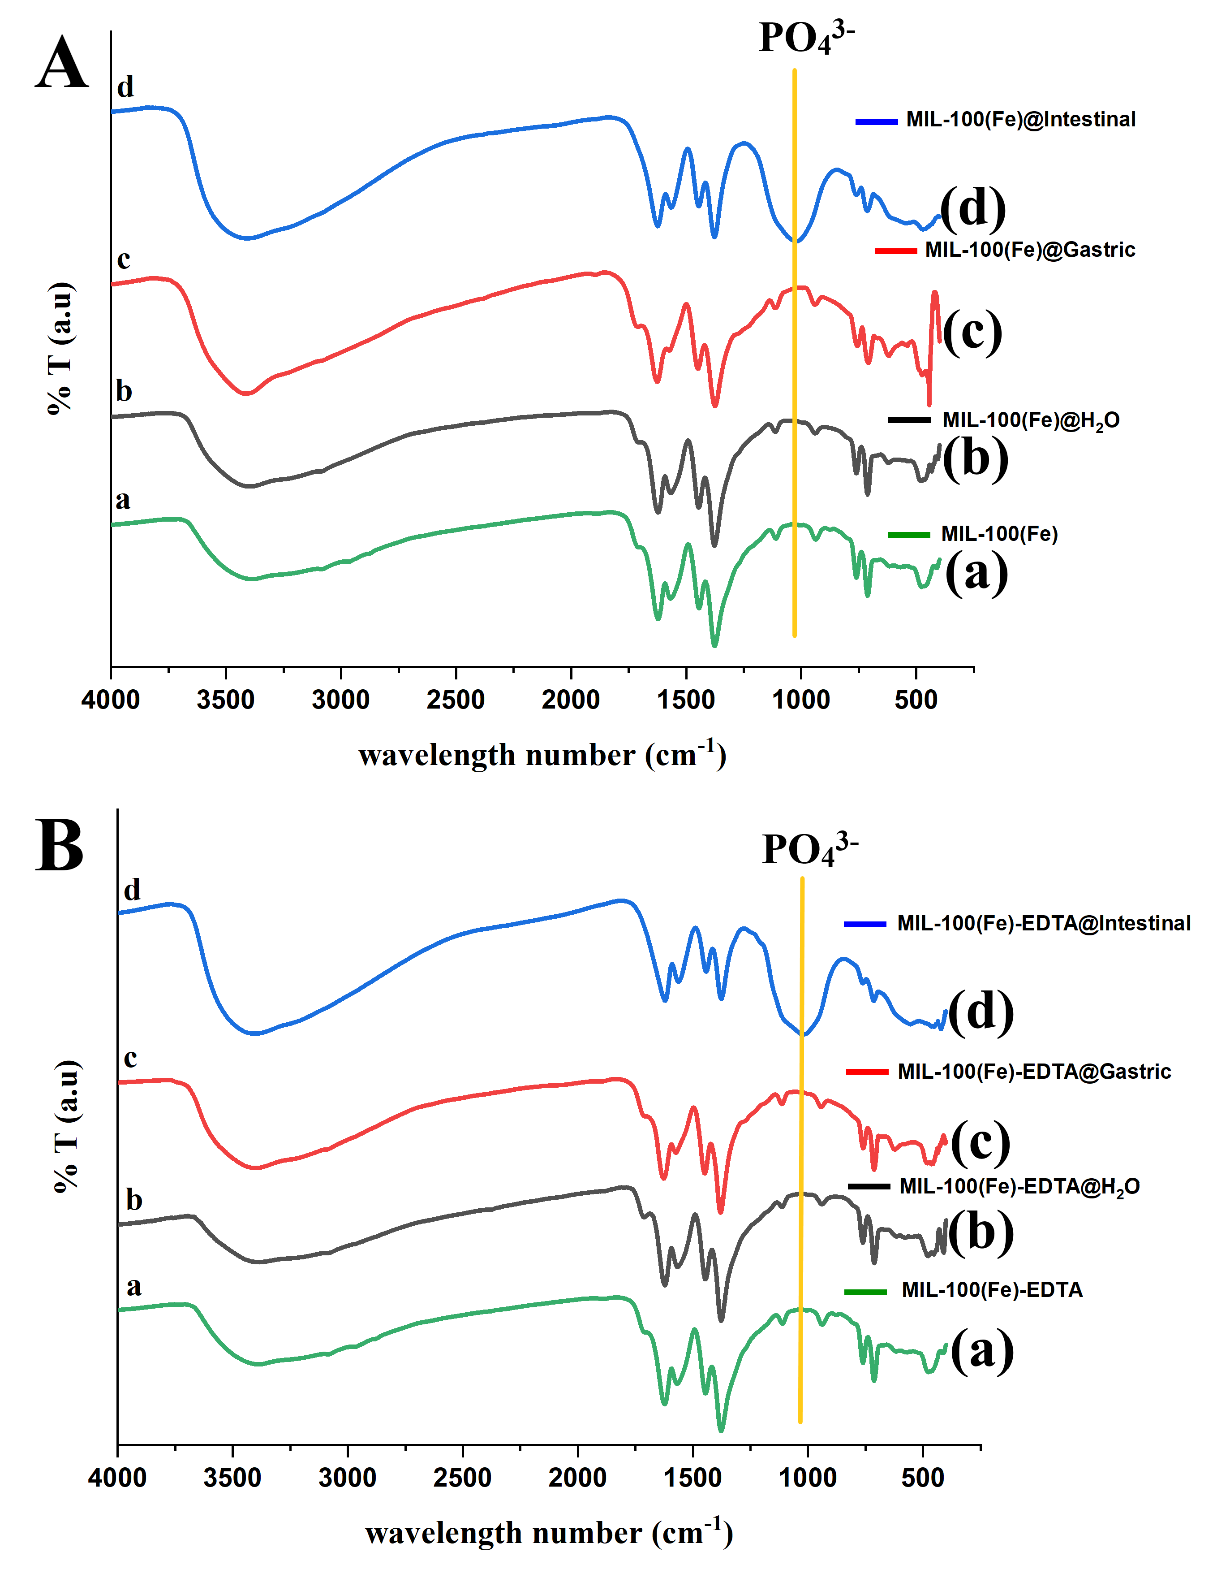


Figure S5. FTIR spectra of MIL-100(Fe) (A) and MIL-100(Fe)-EDTA (B): initial materials (a) and after the stability test in water media (b), gastric (HCL, pH 1.2 for 2h) (c) and intestinal simulation media (Ringer media, pH 6.0 for 24 h) (d)

**Section S6. The experimental data and result of the adsorption efficiency measurement**

1. **Adsorption efficiency of MIL-100(Fe) and MIL-100(Fe)-EDTA**

Standard curve of Pb2+ ions

| **Concentration (ppm)** | **Absorbance** |
| --- | --- |
| 0 | 0.0000 |
| 2 | 0.0245 |
| 4 | 0.0464 |
| 6 | 0.0698 |
| 8 | 0.0863 |
| 10 | 0.1065 |
| 12 | 0.1275 |


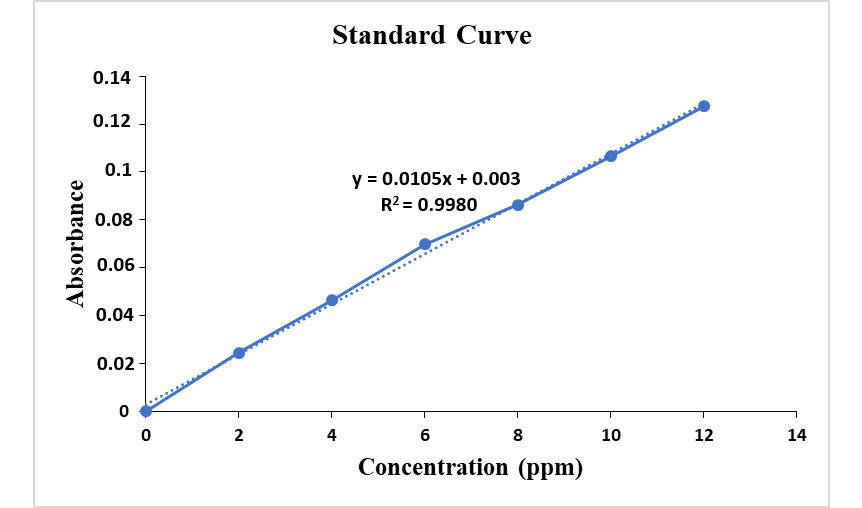


Figure S6a. Standard curve of Pb2+ ions in determining the adsorption efficiency

**Table S6. Adsorption efficiency of MIL-100(Fe) and MIL-100(Fe)-EDTA**

| **Adsorbent** | **Absorbance** | **Co (ppm)** | **Ce (ppm)** | **Adsorption efficiency (%)** | **q (mg/g)** |
| --- | --- | --- | --- | --- | --- |
| MIL-100(Fe) | 0.0486 | 4.7227 | 4.4054 | 6.7186 | 0.3173 |
| MIL-100(Fe)-EDTA | 0.0425 | 4.7227 | 3.8525 | 18.4259 | 0.8702 |

1. **Effect of pH on the Pb2+ ions adsorption efficiency**

Standard curve of Pb2+ ions

| **Concentration (ppm)** | **Absorbance** |
| --- | --- |
| 0 | 0.0000 |
| 2 | 0.0245 |
| 4 | 0.0464 |
| 6 | 0.0698 |
| 8 | 0.0863 |
| 10 | 0.1065 |
| 12 | 0.1275 |


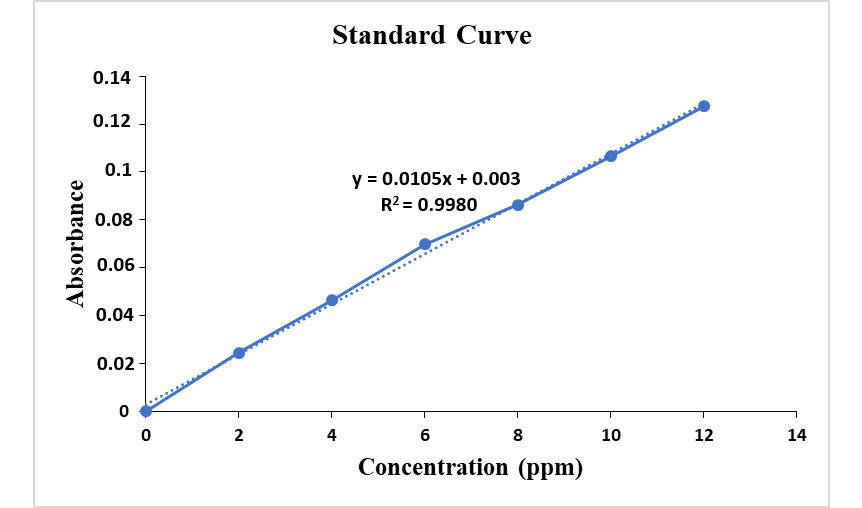


Figure S6b. Standard curve of Pb2+ ions in determining the optimum pH

1. Before adsorption

| **Control** | **Absorbance** | **Cₒ (ppm)** |
| --- | --- | --- |
| pH 1.2 | 0.0246 | 2.2299 |
| pH 2 | 0.0272 | 2.4656 |
| pH 3 | 0.0191 | 1.7313 |
| pH 4 | 0.0083 | 0.7524 |
| pH 5 | 0.0045 | 0.4079 |
| pH 6 | 0.0055 | 0.4986 |
| pH 6.8 | 0.0024 | 0.2176 |
| pH 8.2 | 0.0055 | 0.4986 |

1. After adsorption

| **pH** | **Absorbance** | **Cₑ (ppm)** | **Adsorption efficiency (%)** | **q (mg/g)** |
| --- | --- | --- | --- | --- |
| 1.2 | 0.0234 | 2.1211 | 4.8791 | 0.1088 |
| 2 | 0.0054 | 0.4895 | 80.1468 | 1.9761 |
| 3 | 0.0011 | 0.0997 | 94.2413 | 1.6316 |
| 4 | 0.0007 | 0.0635 | 91.5603 | 0.6889 |
| 5 | 0.0016 | 0.1450 | 64.4521 | 0.2629 |
| 6 | 0.0013 | 0.1178 | 76.3738 | 0.3808 |
| 6.8 | 0.0014 | 0.1269 | 41.6819 | 0.0907 |
| 8.2 | 0.0024 | 0.2176 | 56.378 | 0.2810 |

### Effect of Contact Time

Standard curve of Pb2+ ions

| **C (ppm)** | **Absorbansi** |
| --- | --- |
| 0 | 0.0000 |
| 2 | 0.0244 |
| 4 | 0.0500 |
| 6 | 0.0768 |
| 8 | 0.1034 |
| 10 | 0.1299 |


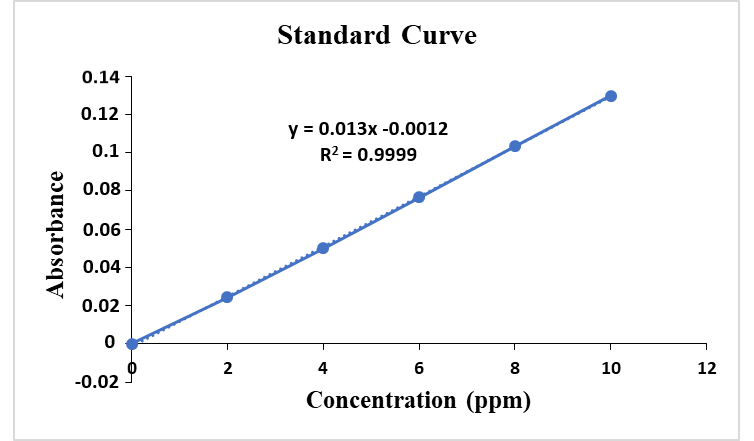


Figure S6c. Standard curve of Pb2+ ions in determining the optimum contact time

| **t (time)** | **Absorbance** | | **Cₒ (ppm)** | **Ce (ppm)** | | **Adsorption efficiency (%)** | **q (mg/g)** |
| --- | --- | --- | --- | --- | --- | --- | --- |
| 15 minute | | 0.0302 | 3.8976 | 2.4030 | 38.3466 | | 1.4946 |
| 60 minute | | 0.0234 | 3.8976 | 1.8818 | 51.7190 | | 2.0158 |
| 90 minute | | 0.0132 | 3.8976 | 1.1000 | 71.7775 | | 2.7976 |
| 120 minute | | 0.0123 | 3.8976 | 1.0311 | 73.5452 | | 2.8665 |
| 360 minute | | 0.0152 | 3.8976 | 1.2533 | 67.8443 | | 2.6443 |
| 720 minute | | 0.0076 | 3.8976 | 0.6708 | 82.7894 | | 3.2268 |
| 1440 minute | | 0.0086 | 3.8976 | 0.7475 | 80.8215 | | 3.1501 |

1. **Effect of Lead Concentration**

Standard curve of Pb2+ ions

| Concentration (ppm) | | Absorbance |
| --- | --- | --- |
| 0 | 0.0000 | |
| 2 | 0.0253 | |
| 5 | 0.0634 | |
| 10 | 0.1254 | |
| 20 | 0.2433 | |
| 30 | 0.3476 | |
| 40 | 0.4455 | |
| 50 | 0.5336 | |


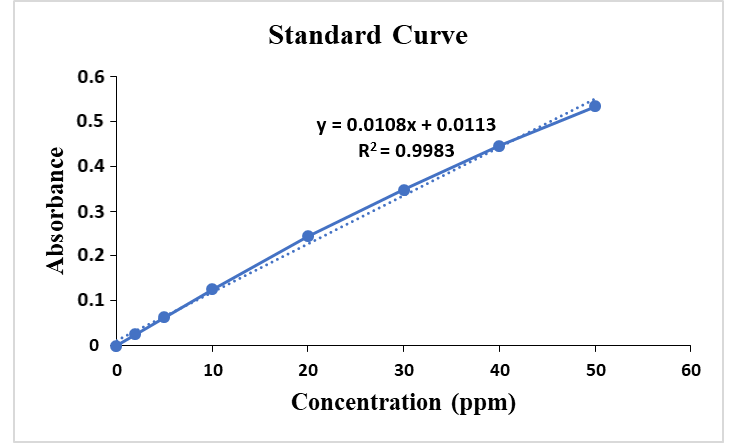


Figure S6d. Standard curve of Pb2+ ions in determining the optimum concentration

| **Co (ppm)** | **Absorbance** | **Ce (ppm)** | **Adsorption efficiency (%)** | **qe (mg/g)** |
| --- | --- | --- | --- | --- |
| 2 | 0.0054 | 0.4861 | 75.7870 | 1.5215 |
| 5 | 0.0063 | 0.5672 | 86.6516 | 3.6820 |
| 10 | 0.0232 | 2.0886 | 74.3931 | 6.0678 |
| 20 | 0.0564 | 5.0775 | 66.3684 | 10.0199 |
| 30 | 0.1673 | 15.0613 | 31.2938 | 6.8600 |

**Section S7.** **Adsorption Kinetics**

1. **Pseudo first order**

| t (time) | qₑ (mg/g) | qₜ (mg/g) | Log (qₑ- qₜ) |
| --- | --- | --- | --- |
| 15 minute | 3.2268 | 1.4946 | 0.2386 |
| 60 minute | 3.2268 | 2.0158 | 0.0831 |
| 90 minute | 3.2268 | 2.7976 | -0.3673 |
| 120 minute | 3.2268 | 2.8665 | -0.4433 |
| 360 minute | 3.2268 | 2.6443 | -0.2347 |
| 1440 minute | 3.2268 | 3.1501 | -1.1152 |

Determination of qₑ and k₁ on pseudo first order kinetics models:

Log (*qe – qt*) = log *qe* - *t*

From Excel obtained equation y = -0.0008x - 0.0458 and R² = 0.7493

1. Adsorption Capacity Determination

а = log qₑ

qₑ = antilog а

qₑ = 10-0.0458

qₑ = 0.8999 mg/g

1. Rate Constant Determination

b = -

-0.0008 = -

k₁ = 0.0018/min

1. **Pseudo second order**

| **t (time)** | **qₑ (mg/g)** | **qt (mg/g)** | **t/qt** |
| --- | --- | --- | --- |
| 15 minute | 3.2268 | 1.4946 | 10.0361 |
| 60 minute | 3.2268 | 2.0158 | 29.7649 |
| 90 minute | 3.2268 | 2.7976 | 32.1704 |
| 120 minute | 3.2268 | 2.8665 | 41.8629 |
| 360 minute | 3.2268 | 2.6443 | 136.1419 |
| 1440 minute | 3.2268 | 3.1501 | 457.1283 |

Determination of qₑ and k₂ on pseudo second order kinetics models:

From Excel obtained equation y = 0.3132x + 9.0021 dan R² = 0.9981

1. Adsorption Capacity Determination

b =

0.3132 =

qₑ = 3.1928 mg/g

1. Rate Constant Determination

a =

k₂ =

k₂ =

k₂ = 0.0109 g/mg.min

**Results and parameter associated with Pseudo first order and Pseudo second order models**

| **Pseudo first order** | | | | | **Pseudo second order** | | | | | |
| --- | --- | --- | --- | --- | --- | --- | --- | --- | --- | --- |
| k₁  (min-1) | | q  (mg/g) | | R2 | k₂  (g/mg.min) | | q  (mg/g) | | R2 | |
| 0.0018 | 0.8999 | | 0.7493 | | 0.0109 | 3.1928 | | 0.9981 | |

**Section S8.** **Adsorption Isotherms**

1. **Langmuir Models**

| Co  (mg/L) | Ce  (mg/L) | Ce  (mmol/L) | qe  (mg/g) | qe  (mmol/g) | Cₑ/qₑ  (g/L) |
| --- | --- | --- | --- | --- | --- |
| 2 | 0.4861 | 0.0023 | 1.5215 | 0.0074 | 0.3108 |
| 5 | 0.5672 | 0.0074 | 3.6820 | 0.0178 | 0.4157 |
| 10 | 2.0886 | 0.0101 | 6.0678 | 0.0293 | 0.3447 |
| 20 | 5.0775 | 0.0245 | 10.0199 | 0.0484 | 0.5062 |
| 30 | 15.0613 | 0.0728 | 6.8600 | 0.0331 | 2.1994 |

From Excel obtained equation y= 27.514x + 0.111 dan R² = 0.9559

1. Maximum Adsorption Capacity (b)

= 27.514

b = 0.0363 mmol/g

b = 3.63 x 10-5 mol/g

b = 7.5141 mg/g

1. Langmuir Adsorption Constant

KL = 248.1821 L/mmol

KL = 248182.0664 L/mol

1. Energy Adsorption

Eads = R T ln K

Eads = 8.314 J/mol.K x 303 K x ln (248182.0664)

Eads = 31292.5751 J/mol

Eads = 31.2926 kJ/mol

1. **Freundlich Models**

| Co  (mg/L) | Ce  (mg/L) | Ce  (mmol/L) | qe  (mg/g) | qe  (mmol/g) | Log Cₑ  (g/L) | Log qₑ  (g/L) |
| --- | --- | --- | --- | --- | --- | --- |
| 2 | 0.4861 | 0.0023 | 1.5215 | 0.0074 | -2.6383 | -2.1308 |
| 5 | 0.5672 | 0.0074 | 3.6820 | 0.0178 | -2.1308 | -1.7496 |
| 10 | 2.0886 | 0.0101 | 6.0678 | 0.0293 | -1.9957 | -1.5331 |
| 20 | 5.0775 | 0.0245 | 10.0199 | 0.0484 | -1.6108 | -1.3152 |
| 30 | 15.0613 | 0.0728 | 6.8600 | 0.0331 | -1.1379 | -1.4802 |

From Excel obtained equation y= 0.4663x - 0.7545 dan R² = 0.6996

1. Freundlich Adsorption Constant

a= *log Kf*

*Kf* = antilog a

*Kf* = 10-0.7545

*Kf* = 0.1759 mg/g

1. Adsorption Intensity

**Results and parameter associated with Freundlich and Langmuir models**

| **Freundlich** | | | **Langmuir** | | |  |
| --- | --- | --- | --- | --- | --- | --- |
| Kf  (mol/g) | n | R2 | KL  (L/mol) | R2 | Eads  (kJ/mol) | qmax  (mg/g) |
| 0.1759 | 2.1445 | 0.6996 | 248182.0664 | 0.9559 | 31.2926 | 7.5141 |
